# Supplementary material
Source: Springer Nature journal article supplement (https://www.springermedizin.de/resource/supplementary/12876_2014_1188_MOESM1_ESM.pdf/9438298)
Supplement: MOESM1 [file 9438298]

All liver biopsies during the period 1984-2009 with a histological diagnosis of fatty liver

(n=420)

Eligible patients

(n=245) 58%

Excluded patients

(n=175) 42%

Non-alcoholic group

(n=151) 66%

Alcoholic group

(n=94) 34%

Gallstones n=17

Drugs n=19

Hepatic disease n=36

Malignancy n=59

Other medical diseases n=14

Jejunioileal bypass operation n=2

Un- or misclassified samples n=10

Lost or missing samples n=10

Lost to follow-up n=8
